# Supplementary material for: ClBRN1 from Chrysanthemum lavandulifolium enhances the stress resistance of transgenic Arabidopsis
Source: PeerJ. 2024 Dec 12;12:e18620. doi: 10.7717/peerj.18620 (PMC11646423; doi:10.7717/peerj.18620)
Supplement: Supplemental Information 1 — The data in Figures 3, 5, 6. [file peerj-12-18620-s001.xlsx]

## Sheet: figure 3
Growth Status of Overexpressing Arabidopsis Thaliana
number of days	Rosette diameter（cm）		Plant height（cm）
	WT	ClBRN1	WT	ClBRN1
12	3.7	2.4	1.1	1
	3.4	3.2	1	1.6
	2.3	2.5	0.8	2.9
	5.1	2.6	1.8	1
	4	2.9	3.2	0.8
	2.9	2.1	1.3	0.9
	5.1	4.2	1.6	2.9
	3.1	3.6	1.9	1.1
	4.2	2.4	1.7	0.8
	4.7	4.4	2.5	1.1
14	4.2	3.6	3.6	3.6
	3.8	4.1	4.2	5.1
	3	3.2	1.3	5.3
	5.3	3.2	5.6	2.1
	4.7	3.3	7.7	0.6
	3.3	2.6	4.2	0.7
	5.5	4.2	6.4	4.9
	3.8	4	6.4	3.7
	4.6	3	5.1	0.6
	5.2	4.8	7.5	1.8
17	4.2	3.5	11.5	10.7
	3.8	3.9	12.5	12.6
	3.1	3.6	7.5	13.2
	5.1	3.6	15.2	6.7
	4.3	3.8	15.5	0.7
	3.2	3.4	11.3	4.9
	5.2	4.6	15.5	13.1
	3.7	4.4	15.6	10.8
	4.6	2.8	14.1	4.7
	4.7	4.9	16.9	7.9
21	4.4	2.9	22.1	20.1
	4.1	3.8	21.2	18.6
	3.1	3.6	16.4	20.4
	4.7	3.7	25.9	11.1
	3.1	3.6	22.3	6.1
	3.4	3.6	19.2	13.6
	6.1	4.7	24.9	23.1
	3.4	4.7	24.4	19.8
	5.1	2.4	23.2	12.4
	5.9	4.6	24.8	16.8
23	4.3	3.2	24.9	22.2
	4.4	3.9	24.2	19.1
	3.2	3.8	19.2	22.9
	4.9	3.2	28.7	12.1
	2.3	3.8	25.7	9.8
	1.9	3.8	21.3	16.1
	6.1	4.9	26.8	25.2
	3.6	4.6	26.8	22.6
	4.4	2.4	25.1	14.1
	4.9	5.3	26.9	19.2
26	4.6	3.3	28.1	25.1
	4.3	4.8	25.3	20.1
	3.6	4.3	21.7	25.7
	4.9	3.2	32.3	13.4
	2.1	3.7	27.1	16.1
	2.1	4.3	24.1	18.9
	5.3	4.9	30.8	29.2
	3.4	4.8	29.1	25.2
	4.6	3.1	28.6	18.3
	5.7	5.2	28.3	22.9
29	4.3	3.7	28.9	26.1
	5.5	4.8	26.9	21.1
	3.4	4.3	23.9	25.9
	5.3	3.3	34.9	17.1
	2.2	2.9	27.2	21.1
	2.2	4.7	26.7	21.1
	5.7	4.9	31.8	31.7
	3.4	4.9	29.5	27.7
	4.7	3.6	30.7	21.1
	5.7	5.3	28.6	14.7
32	4.3	3.6	29.4	27.2
	3.8	4.6	27.4	21.8
	3.4	3.7	23.7	26.3
	5.2	3.6	35.8	20.8
	2.1	2.7	27.1	25.6
	2.2	4.5	26.9	21.7
	5.7	4.8	32.5	32.1
	3.6	4.8	28.9	27.8
	4.6	3.3	30.5	23.9
	5.3	4.8	28.8	19.6
35	4.4	3.6	29.4	27.4
	3.8	4.3	27.4	21.2
	3.4	3.6	24.3	26.3
	5.2	3.2	35.9	23.9
	2.1	3.3	27.5	28.2
	2.2	4.6	27.1	24.9
	5.6	4.8	32.5	32.3
	3.6	4.9	29.8	27.9
	4.6	4.2	31.4	24.2
	5.3	5.1	29.3	23.8
38	4.4	3.3	29.4	27.6
	3.8	4.7	27.4	21.9
	3.1	3.5	24.3	24.1
	4.9	3.2	36.1	24.1
	2.1	3.3	27.7	28.8
	2.2	4.8	27.1	24.9
	5.8	4.8	32.3	32.3
	3.7	5.2	29.4	27.9
	4.2	3.7	30.7	24.2
	4.8	5.4	29.3	24.4

## Sheet: figure 5
Growth Status Statistics of Arabidopsis Thaliana at 4 °C under NaCl Treatment for 3 days
	NaCl				1/2Ms 4°
	Root elongation（cm）	Lateral root number	Mean lateral root length（cm）	Survival rate	Root elongation（cm）	Lateral root number	Mean lateral root length（cm）	Survival rate
ClBRN1	0.2	7	0.1	1	1.2	4	1	1
	0.15	5	0.2		1.5	7	0.7
	0.1	6	0.1		1.8	4	0.8
	0.25	4	0.2		1.6	3	0.7
	0.3	4	0.1		2	8	1.8
	0.2	4	0.3		1.9	5	0.8
	0.2	3	0.2		1.1	7	1.1
	0.25	5	0.2		1.3	5	1.3
	0.2	4	0.2		0.8	5	0.9
	0.3	5	0.1		1.1	7	0.8
	0.2	4	0.3		1.3	9	0.6
	0.2	8	0.2		1.2	9	1
	0.1	4	0.2		1.3	4	0.8
	0.3	5	0.3		1	7	0.7
	0.2	5	0.2		1.1	8	0.9
					0.8	7	1.2
WT	0.2	3	0.2	0.75	0.5	4	0.4	1
	0.2	2	0.2		1.2	3	0.2
	0.2	3	0.4		0.4	5	0.1
	0.2	2	0.2		1.3	4	0.5
	0.2	3	0.6		1.3	4	0.2
	0.2	3	0.3		1.2	2	0.3
	0.2	5	0.4		0.5	5	0.1
	0.2	3	0.2		0.8	4	0.2
	0.2	5	0.3		1.6	4	0.1
	0.2	4	0.4		1	4	0.3
	0.2	5	0.4		1.3	4	0.4
	0.2	3	0.2		1.1	3	0.2
	0.2	2	0.2		0.6	2	0.4
	0.3	3	0.4		0.9	2	0.2
	0.2	4	0.3		0.6	4	0.3
	0.3	2	0.2		0.6	4	0.2

## Sheet: figure 6
Cell wall thickness of Arabidopsis thaliana stems
	WT(μm)	ClBRN1（μm）
1	4.042	7.107
2	3.312	8.552
3	3.682	7.31
4	3.833	6.538
5	4.003	7.987
6	3.655	8.264
7	4.568	10.348
8	3.655	9.393
9	3.5	11.247
